# Supplementary material for: Complete characterization of RNA biomarker fingerprints using a multi-modal ATR-FTIR and SERS approach for label-free early breast cancer diagnosis
Source: Royal Society of Chemistry journal article supplement (doi:10.1039/d3ra05723b), 2024-01-01
Supplement: d3ra05723b1.pdf [file d3ra05723b1.pdf]

**Supplementary Information**  
**for**  
**Complete Characterization of RNA Biomarker Fingerprints**  
**Using a Multi-Modal ATR-FTIR and SERS Approach for Label-Free Early**  
**Breast Cancer Diagnosis**

**1. ATR-FTIR measurements under vacuum and atmospheric conditions**

Fig. S1(a) and (b) show the measurement results of DNA, miRNA, and water samples in the liquid form under atmospheric and vacuum conditions, respectively. Water has strong absorption in the infrared region; hence, the absorption peaks of DNA and miRNA molecules were entirely covered by water. With the vacuum process removing the water from the DNA and miRNA solution samples, the absorption peaks of DNA and miRNA molecules could then be visualized.

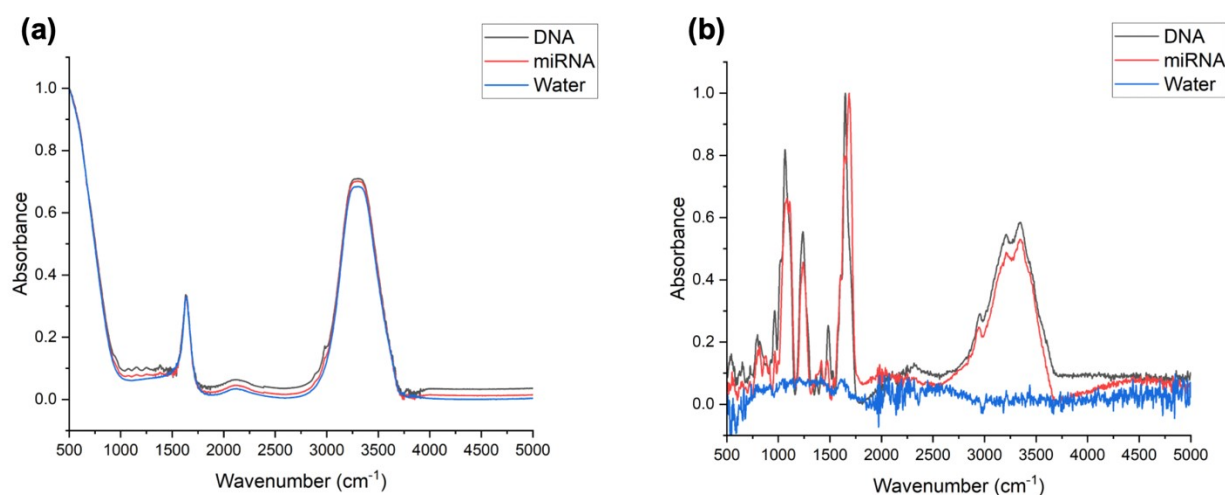

**Figure S1.** ATR-FTIR measurements of DNA (black curves), miRNA (red curves), and water (blue curves) solution samples under (a) atmospheric conditions and (b) under vacuum conditions.

## 2. Additional ATR-FTIR measurements on synthetic miRNA samples

Fig. S2 shows the measured spectra of synthetic miRNA samples under the vacuum condition. The results match with the clinical extracted samples with the prominent fingerprint regions broadly located in two regions,  $800 - 2000 \text{ cm}^{-1}$  and  $2800 - 3500 \text{ cm}^{-1}$ .

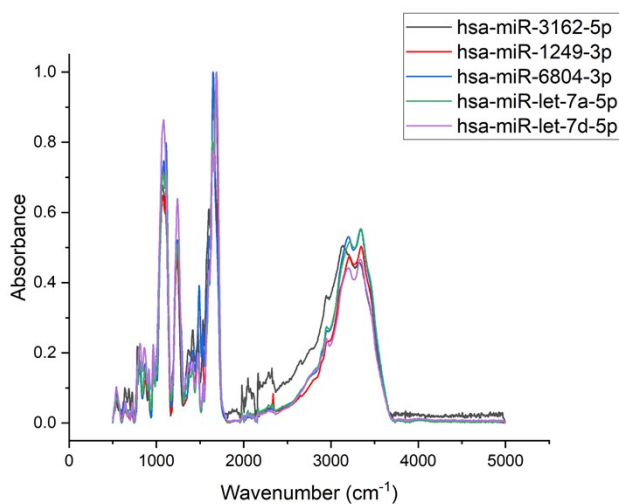

**Figure S2.** Measurement results of synthetic miRNA samples, hsa-miR-3162-5p (black curve), hsa-miR-1249-3p (red curve), hsa-miR-6804-3p (blue curve), hsa-miR-let-7a-5p (purple curve), and hsa-miR-let-7d-5p (yellow curve).

### 3. Machine learning models

Table S1 gives a list of the machine learning models that were studied in this manuscript.

**Table S1.** List of machine learning models

| <b>No.</b> | <b>Group</b>                    | <b>Model</b>                       |
|------------|---------------------------------|------------------------------------|
| 1          | Decision trees                  | Fine tree                          |
| 2          |                                 | Medium tree                        |
| 3          |                                 | Coarse tree                        |
| 4          |                                 | All trees                          |
| 5          |                                 | Optimizable tree                   |
| 6          | Discriminant analysis           | Linear discriminant analysis       |
| 7          |                                 | Quadratic discriminant analysis    |
| 8          |                                 | Optimizable discriminant analysis  |
| 9          | Logistic regression classifiers | Logistic regression                |
| 10         | Naïve Bayes classifiers         | Gaussian naïve Bayes               |
| 11         |                                 | Kernel naïve Bayes                 |
| 12         |                                 | Optimizable naïve Bayes            |
| 13         | Support vector machines         | Linear SVM                         |
| 14         |                                 | Quadratic SVM                      |
| 15         |                                 | Cubic SVM                          |
| 16         |                                 | Fine Gaussian SVM                  |
| 17         |                                 | Medium Gaussian SVM                |
| 18         |                                 | Coarse Gaussian                    |
| 19         |                                 | Optimizable SVM                    |
| 20         | Nearest neighbor classifiers    | Fine KNN                           |
| 21         |                                 | Medium KNN                         |
| 22         |                                 | Coarse KNN                         |
| 23         |                                 | Cosine KNN                         |
| 24         |                                 | Cubic KNN                          |
| 25         |                                 | Weighted KNN                       |
| 26         |                                 | Optimizable KNN                    |
| 27         | Ensemble classifiers            | Boosted trees                      |
| 28         |                                 | Bagged trees                       |
| 29         |                                 | Subspace discriminant              |
| 30         |                                 | Subspace KNN                       |
| 31         |                                 | Random undersampling boosted trees |
| 32         |                                 | Optimizable ensemble               |
